# Supplementary figures and images for: Predicting Tumor Budding Status in Cervical Cancer Using MRI Radiomics: Linking Imaging Biomarkers to Histologic Characteristics
Source: MDPI journal article supplement (doi:10.3390/cancers13205140), 2021-10-14

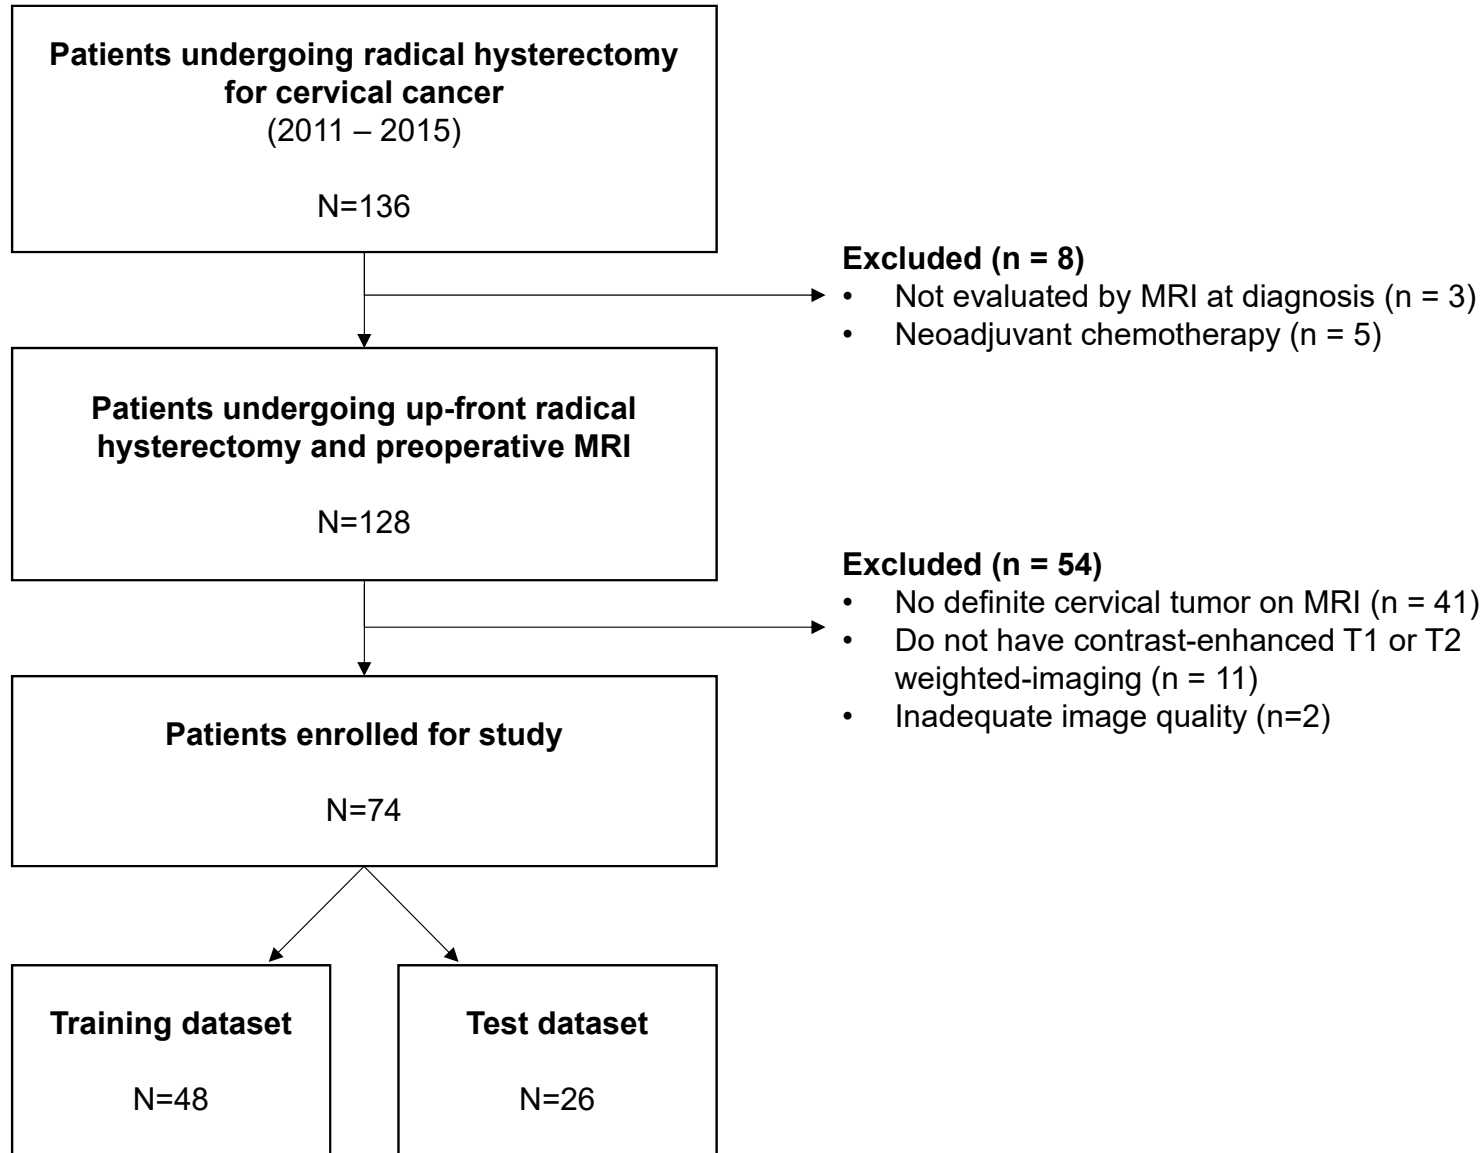

Supplement: s1 [file s1]

(a)

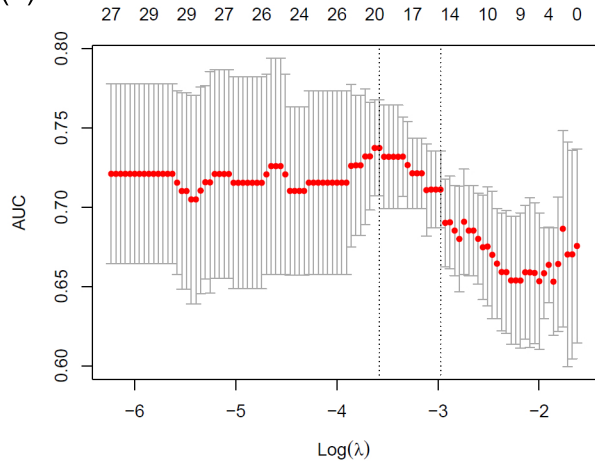

(b)

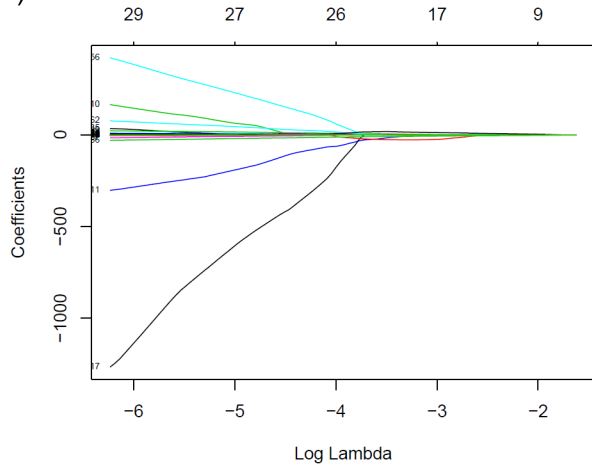

Supplement: s1 [file s1]
